# Supplementary material for: Modulating the ion-transfer electrochemistry of perfluorooctanoate with serum albumin and β-cyclodextrin
Source: Royal Society of Chemistry journal article supplement (doi:10.1039/d3an02164e), 2024-01-01
Supplement: d3an02164e1.pdf [file d3an02164e1.pdf]

## Electronic Supplementary information

### Modulating the ion-transfer electrochemistry of perfluorooctanoate with serum albumin and $\beta$ -cyclodextrin

Hum Bahadur Lamichhane and Damien W. M. Arrigan\*

School of Molecular and Life Sciences, Curtin University, GPO Box U1987, Perth, Western Australia  
6845, Australia

Corresponding author,

Emails [d.arrigan@curtin.edu.au](mailto:d.arrigan@curtin.edu.au) (D.W.M. Arrigan)

#### List of contents:

**Figure S1.** Differential pulse voltammograms of tetrapropylammonium (TPPr<sup>+</sup>) in the presence of different concentration of BSA at the  $\mu$ ITIES array.

**Figure S2** Cyclic voltammograms of KPF<sub>6</sub> in presence and absence of BSA.

**Figure S3.** Differential pulse voltammograms of tetrapropylammonium (TPPr<sup>+</sup>) in the presence of different concentration of  $\beta$ -CD at the  $\mu$ ITIES array.

**Figure S4** Cyclic voltammogram of KPF<sub>6</sub> in presence of  $\beta$ -CD.

**Figure S5.** Differential pulse voltammograms (without background subtraction) of  $\beta$ -CD at fixed concentration of BSA at the  $\mu$ ITIES array.

**Figure S6.** Plot of mole fraction obtained during titration of a fixed concentration of PFOA at different concentrations of  $\beta$ -CD.

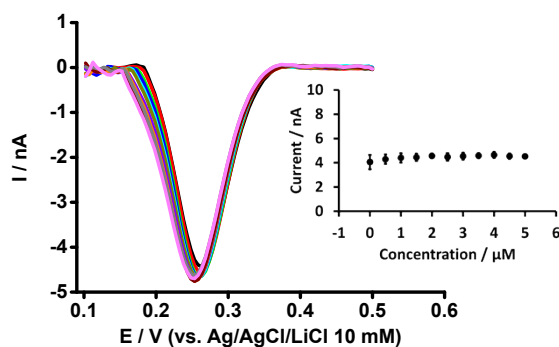

**Figure S1:** DPVs of 5  $\mu\text{M}$  TPrA<sup>+</sup> at different concentrations of BSA in 10 mM LiCl as the aqueous phase and 10 mM BTTPATPBCl (1,2-DCE) as the organic phase. Inset: relationship between current and concentration of BSA. All DPVs are background subtracted followed by baseline corrected. Error bars are  $\pm 1$  standard deviation of three independent measurements. When error bars are not visible, they are smaller than the symbol size.

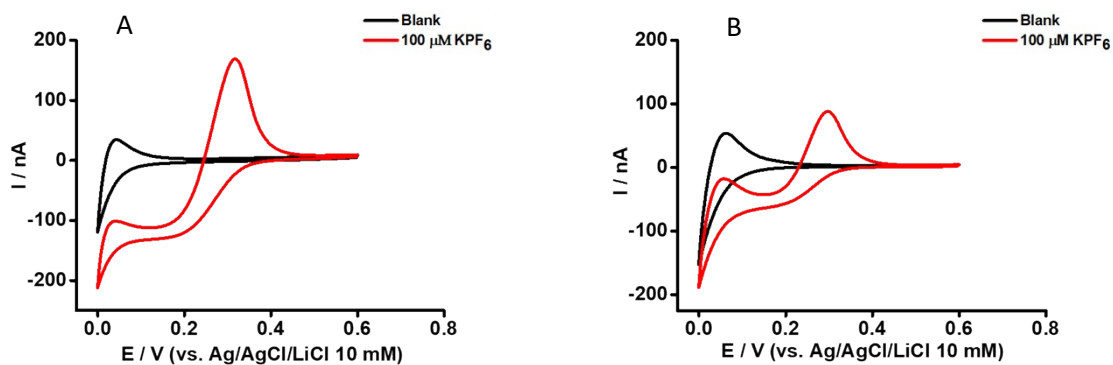

**Figure S2.** CVs of the absence (black) and presence (red) of 100  $\mu\text{M}$  KPF<sub>6</sub>. 10 mM BTTPATPBCl (1,2-DCE) as the organic phase. A) 10 mM LiCl as the aqueous phase. B) 10 mM LiCl + 0.6 mM BSA as the aqueous phase. Scan rate: 10  $\text{mV s}^{-1}$ .

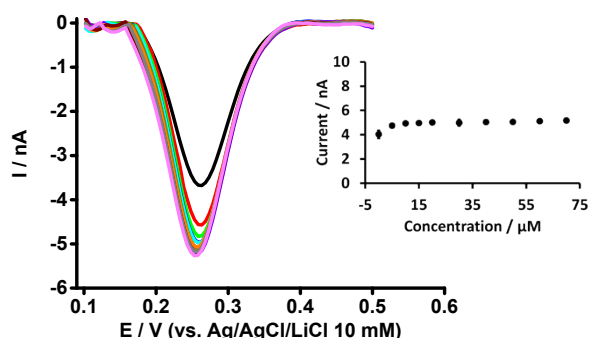

**Figure S3.** DPVs of 5  $\mu\text{M}$  TPrA<sup>+</sup> at different concentration of  $\beta\text{-CD}$  in 10 mM LiCl aqueous phase with 10 mM BTTPATPBCl (1,2-DCE) organic phase. Inset: relationship between current and concentration of  $\beta\text{-CD}$ . All DPVs are background subtracted followed by baseline corrected. Error bars are  $\pm 1$  standard deviation of three independent measurements. When error bars are not visible, they are smaller than the symbol size.

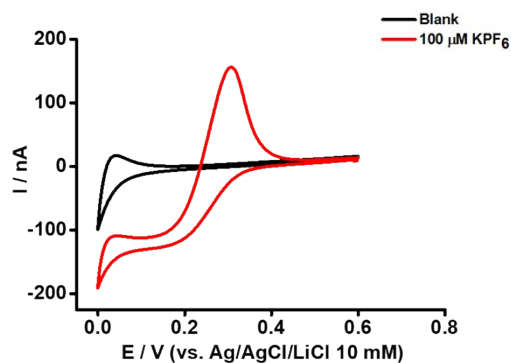

**Figure S4.** CVs of the absence (black) and presence (red) of 100  $\mu\text{M}$  KPF<sub>6</sub>. 10 mM BTTPATPBCl (1,2-DCE) as the organic phase. 10 mM LiCl + 0.6 mM  $\beta\text{-CD}$  as the aqueous phase. Scan rate: 10 mV s<sup>-1</sup>.

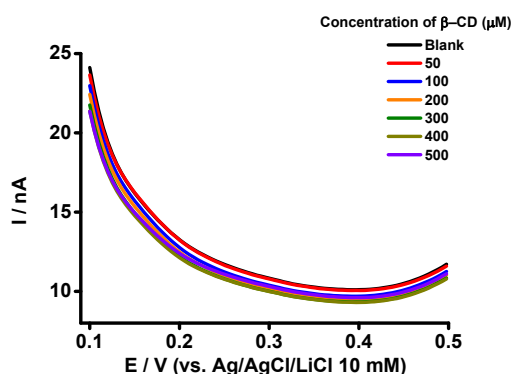

**Figure S5.** DPVs without  $\beta\text{-CD}$  and with different concentrations of  $\beta\text{-CD}$  at a fixed concentration of BSA (0.6 mM) at the  $\mu\text{TIES}$  array using 10 mM LiCl as the aqueous phase (without PFOA). The organic phase is 10 mM BTTPATPBCl (1,2-DCE).

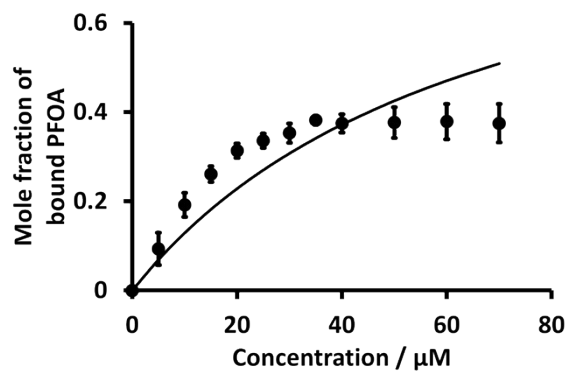

**Figure S6.** Plot of mole fraction of bound PFOA obtained during titration of a fixed concentration of PFOA (i.e. 5  $\mu\text{M}$ ) at different concentration of  $\beta\text{-CD}$  (dotted line). Nonlinear fitting using the Langmuir binding isotherm model (equation 3) (solid line) using all concentrations studied for 1:1  $\beta\text{-CD}$ :PFOA complex. Error bars are  $\pm 1$  standard deviation of three independent measurements. When error bars are not visible, they are smaller than the symbol size.
